# Supplementary material
Source: publisher figshare collection journal article supplement (https://adisjournals.figshare.com/ndownloader/files/38560055)
Supplement: Supplementary file 1 [file 38560055]

The graphical abstract represents the opinions of the authors. For a full list of declarations, including funding and author disclosure statements, and copyright information, please see the full text online.

## WHY LIVING WITH PULMONARY ARTERIAL HYPERTENSION REQUIRES A HOLISTIC APPROACH: A PATIENT AND CLINICIAN PERSPECTIVE

HALEY LYNN (PATIENT) MELISA WILSON (CLINICIAN)

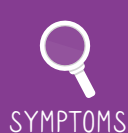

**Need for increased awareness** of PAH symptoms and understanding of diagnostic tests

**PAH is a rare, progressive disease.** Limited awareness of severity, and fatal if left untreated<sup>1,2</sup>

**Regular risk assessment** to guide treatment decisions<sup>2,4</sup>

**Early recognition of symptoms**, with timely diagnosis and referral to a PAH specialist<sup>3</sup>

DIAGNOSIS & REFERRAL

**Appropriate diagnostic tools<sup>2</sup>** with consideration for patient diversity<sup>5</sup>

HOLISTIC MDT MANAGEMENT

**Clear, accurate, and timely** information and education for patients and caregivers

**Long-term care** by an MDT to provide support with medical, social, mental, and financial issues

**A holistic, multidisciplinary approach** for comprehensive care is recommended in clinical guidelines<sup>2</sup>

OUTCOME

OUTCOME

OUTCOME

PATIENTS UNDERSTAND THE SERIOUSNESS OF PAH and their active role in managing their condition

PATIENTS HAVE THE SUPPORT, SKILLS, AND TOOLS to help them persist with treatment for optimal outcomes

Early, meaningful, and empathetic communication with comprehensive, tailored education helps patients to prepare for the widespread impact of PAH on their lives and take ownership

Palliative care<sup>2</sup> should be a part of an integrated approach in the treatment journey
